1       **Retrospective Clinical Surveillance Measuring Healthcare Associated Infection**  
2       **(HAI) Rates Pre-and Post-Inclusion of Novel Silver Ion Antimicrobial Textile**  
3       **Intervention in an Infection Control Program**

4       **Authors**

5       Priya Balachandran, Ph.D.\*, Applied Silver, Inc.

6       Kavita Mathur, Ph.D., North Carolina State University

7       J. Trees Ritter, D.O., IDSA, Central Coast Infectious Disease Consultants

8

9       **Key words:**

10      Healthcare-associated infections

11      Infection prevention and control

12      Silver ions

13      Antimicrobial textiles

14

15      **FUNDING**

16      This research did not receive any specific grant from funding agencies in the public,  
17      commercial, or not-for-profit sectors.

18

19      **DECLARATIONS OF INTEREST**

20      PB is an employee of and JTR is a shareholder with Applied Silver, Inc. None declared for KM..

21

22      **CRedit AUTHOR STATEMENT**

23      PB: Methodology, formal analysis, writing, project administration; KM: Review and editing, formal  
24      analyses; TJR: Conceptualization, review and editing, resources

25

26      **\*CORRESPONDING AUTHOR:**

27      Priya Balachandran, Ph.D., 26254 Eden Landing Road, Hayward, CA 94545, U.S.A.

28

29

1 **SUMMARY**

2 Healthcare linens act as a vector of microbial transmission through use, storage and handling.  
3 In this retrospective multi-year, multi-site study, the impact of an infection prevention program,  
4 that included an automated silver ion-based antimicrobial laundry treatment, was studied. A  
5 composite reduction of 42% in healthcare associated infection (HAI) rates was observed, with  
6 the biggest reductions associated with CAUTI and CDI rates. Although further study is needed  
7 to better understand the exact contribution of such an intervention towards prevention of  
8 HAIs, ionic silver treatment of healthcare textiles may prove to be a useful tool in HAI reduction  
9 strategies.

10

## 1 INTRODUCTION

2 Healthcare textiles are recognized as an epidemiologically important environmental surface  
3 implicated in outbreaks caused by pathogens within the hospital environment<sup>1-4</sup>. A recent  
4 environmental sampling study for 13 confirmed COVID-19 patients found extensive  
5 contamination of patients' surroundings including pillows and bedsheets<sup>5</sup>. Microbial  
6 contamination of healthcare textiles occurs at multiple points, each contributing in varying  
7 degrees to the spread of infections. Linens become contaminated while in use by patients and  
8 healthcare workers, due to intimate contact with the patients' skin, which constantly sheds  
9 pathogen laden skin scales and hair fibers<sup>1,3,4</sup>. Similarly, ambulatory patients track pathogens  
10 on the soles of their feet/socks back into the bed<sup>6</sup>. In hospitals where bed linens are not  
11 changed daily, contamination poses an infection risk to the patient who has indwelling devices  
12 such as urinary and vascular catheters which provide a direct portal of entry for pathogens<sup>7</sup>.  
13 Privacy curtains are another type of soft surface/textile in patient rooms that commonly  
14 become contaminated due to frequent handling. Contamination, especially on the grab area of  
15 the curtains, acts as a source of pathogen transmission from patient to patient via healthcare  
16 worker hands<sup>1</sup>. Another source of contamination occurs when clean linens are handled during  
17 transportation and storage<sup>2</sup>. Finally, pathogens such as *Clostridoides difficile* remain after  
18 laundering if stringent disinfection parameters are not met, subjecting the next patient to  
19 infection risk<sup>8</sup>.

20  
21 Studies have demonstrated that incorporating metal ion-based antimicrobials in soft and hard  
22 surfaces in hospitals reduce healthcare-associated pathogens and associated infections<sup>3,4</sup>. For  
23 example, the use of copper-threaded/embedded fabrics in healthcare settings has achieved  
24 reductions in the pathogens that cause HAIs, such as *Staphylococcus aureus* (*S. aureus*),  
25 *Escherichia coli*, norovirus and other multi-drug resistant organisms (MDROs)<sup>3</sup>. While effective,  
26 these threaded/embedded textiles require purchase of new, specialized inventory which can be  
27 costly to implement, maintain and replace when inventory is lost or degrades over time.

28 Our previous work found that hospital textiles treated with ionic silver during each laundry  
29 cycle resulted in over an 80% reduction in post-laundry levels of aerobic bacterial counts,  
30 *Staphylococcus aureus* and methicillin resistant *Staphylococcus aureus* (MRSA), pre- and post-  
31 patient use<sup>4</sup>. Ionic silver has broad spectrum antibacterial, antifungal and antiviral activity<sup>8</sup>.  
32 In this follow-on study continued at the same community hospital locations, the impact of the  
33 same silver-ion treatment of textiles was evaluated on HAI rates when implemented as a  
34 component of an infection prevention program to provide textile-mediated immediate and  
35 residual antimicrobial activity.

36

37

38

39

## 1   **METHODS**

2   A retrospective, non-randomized before-and-after control study was designed to assess the  
3   efficacy of a silver ion-based laundry additive on HAI rates over an 18-month period (January  
4   2016 to June 2017) and a 30-months period (January 2016 to June 2018). The study was  
5   conducted at five community hospitals located within the same hospital system, three of which  
6   served as treatment hospitals. All three treatment hospitals have similar patient acuity levels,  
7   demographics and are serviced by the same laundry facility accredited by the Healthcare  
8   Laundry Accreditation Council (HLAC). Hospital 1 had 286 available beds with a 67% occupancy  
9   rate, Hospital 2 had 112 available beds with a 67.5 % occupancy rate and Hospital 3 had 35  
10   available beds with a 67% occupancy rate. All three hospitals had average length of stay of 4  
11   days.

12   Two additional hospitals within the same hospital system, with similar patient acuity levels,  
13   demographics and infection prevention programs, served as control sites during 18 of the 30-  
14   month baseline period (“before”), and 18 of the 30-month after intervention period (“after”).  
15   Control hospital 1 had 155 available beds with a 46% occupancy rate, Control hospital 2 had  
16   240 available beds with a 52% occupancy rate. Both hospitals had an average length of stay 4  
17   days. At 18 months into the study period, based on the success of the study hospitals, the  
18   control hospitals opted to include silver ion laundry treatment for their infection control  
19   program and discontinued serving as control sites.

20   In January 2016, the silver ion dosing unit installed at the contract laundry facility servicing the  
21   three treatment hospitals was turned on and the treatment of laundry was monitored via  
22   cloud-based remote telemetry system (SilvaClean by Applied Silver Reg. No. 90335-1). During  
23   the intervention period the hospitals received antimicrobial treated flat patient bed sheets,  
24   fitted sheets, pillowcases and patient gowns. During the same period the control hospitals  
25   received sheets, pillowcases and patient gowns laundered in the usual process without the  
26   addition of any silver ion antimicrobial treatment.

27   The silver ion treatment requires no change in laundry facility staffing or workflow. The ionic  
28   silver solution is introduced during the laundry rinse cycle in an automated fashion.

29   There were no reported changes in any other infection prevention (IP) products or practices in  
30   any of the hospitals during the study. The IP products and practices in place at each of the study  
31   and control hospitals were aligned with professional clinical guidelines from the Center for  
32   Disease Control and Prevention (CDC) and the Association for Infection Control and  
33   Epidemiology (APIC). HAI surveillance was conducted retrospectively for catheter associated  
34   urinary tract infection (CAUTI), central line associated bloodstream infection (CLABSI),  
35   *Clostridium difficile* infection (CDI) and surgical site infection (SSI). HAI definitions were based  
36   on the CDC’s National Health and Safety Network (NHSN) program.

37   Baseline HAI rates were documented for 30 months from July 2013 to December 2015. HAI  
38   surveillance continued during the 30-month intervention period from January 2016 to June

1 2018, while the silver ion-based laundry additive was in use. Infection rates were normalized  
2 with a denominator of 10,000 patient days. Statistical analysis included use of the Fisher exact  
3 test.

4

5

6

7

8

9

10

11

12

13

14

15

16

17

18

19

20

21

22

23

24

25

26

27

28

## 1 RESULTS AND DISCUSSIONS

2 In a prior peer-reviewed published study, treatment of incumbent linens with silver ions during  
3 laundering resulted in statistically significant reductions of > 80% in the levels of total bacteria,  
4 *S. aureus* and MRSA, both pre and post patient use, as a result of residual antimicrobial effect<sup>4</sup>.  
5 This current follow-on study shows that an infection prevention bundle strategy at the three  
6 community hospitals within a hospital system, which included this seamless, automated silver  
7 ion laundry technology, reduced overall healthcare associated infection rates by 42% after 30  
8 months of implementation.

9 In the current study, the impact of the silver-ion based laundry treatment on individual HAI  
10 types varied. Although all HAI types were not measured, of those tracked during the study (CDI,  
11 CAUTI, CLABSI and SSI) clinically significant reductions were seen in CDI and CAUTI. There was a  
12 statistically significant (50%) reduction in CDI from 4.7 to 2.4/10,000 patient days ( $p=0.001$ ),  
13 and a 41% reduction (not statistically significant) in CAUTI from 8.8 to 5.2/10,000 patient days  
14 ( $p=0.081$ ). A minor impact was observed on SSI rates and no impact was observed on CLABSI  
15 rates (Figure 1). This variation in percentage reduction for the different HAI types can be  
16 explained by how pathogens enter the host. CAUTI typically occurs as the result of pathogen  
17 contamination of either the internal or external surface of the urinary catheter<sup>7</sup>. Since the  
18 catheter can come in contact with a patient's bed linen, any contamination on the bed linen can  
19 potentially be transferred to the external surface of the catheter, which provides a direct route  
20 of entry into the bladder where the pathogens can multiply and result in an infection.

21 CDI typically is caused by the introduction of fecal bacteria to the patient's mouth via  
22 contaminated hands or objects, usually at a time when the patient's bowel flora has been  
23 disrupted by antibiotics and/or gastric ulcer prophylaxis<sup>6</sup>. Studies show that patients in rooms  
24 where an MDRO patient (such as CDI) resided previously will have an increased risk of infection  
25 due to insufficiently disinfected surfaces, including the floor<sup>10</sup>. Patients walking to and from the  
26 bathroom and back to bed could bring *C.difficile* from the floor, transferring it to the bed linen.  
27 From there it is possible for patient hands or objects to become contaminated, and then for  
28 that contamination to be transferred from hand to mouth, resulting in potential infection<sup>10</sup>.

29 The impact on SSI was marginal. Possible explanations could include that infections are  
30 introduced during the procedure itself and/or that post surgically patients are on antibiotics.  
31 No impact was observed on CLABSI rates potentially indicating that textile-borne pathogens do  
32 not contribute to these types of infections. When the infection rates were evaluated for each  
33 individual hospital, consistent declines of 48%, 21% and 16% for each of the three hospitals (for  
34 a composite decline of 42%), primarily contributed by the declines observed in CAUTI and CDI  
35 rates (Figure 2). The hospitals observed a decline of 43% in overall infection rates at the interim  
36 18-month evaluation period (8.72 to 4.91/10,000 patient days), during which time the control  
37 hospitals observed 4% decline in their infection rates (10.50 to 10.05/10,000 patient days). At  
38 this time, these hospitals dropped out as controls and began using the silver ion laundry  
39 treatment. While all three treatment hospitals showed a declining trend in infection rates,

1 majority of the decline observed in the composite number was driven by Hospital 1, which also  
2 had the largest number of occupied beds.

3

4

5

6

7

8

9

10

11

12

13

14

15

16

17

18

19

20

21

22

23

24

25

26

27

1 **CONCLUSIONS**

2 This study highlights the benefit of a silver ion-based laundry treatment as an added  
3 element in infection prevention programs. This technology is fully automated, requires  
4 no additional inventory, training or change in workflow. The specific reduction in CDI  
5 and CAUTI reported in this study, suggests that certain infection prevention bundles  
6 may benefit more with this soft surface intervention than others.

7 One limitation of this study is that the exact contribution of the silver ion-based  
8 antimicrobial textile intervention cannot be measured using the retrospective analyses  
9 study design. Additional studies would also be required to replicate these findings and  
10 to measure the impact of the laundry treatment on other HAIs (e.g. ventilator  
11 associated pneumonia), other high-touch surfaces such as privacy curtains, as well as  
12 complementarity to other infection prevention interventions. The combination of silver  
13 ion-based treatments' ability to effectively combat both viruses and antibiotic-resistant  
14 pathogens makes it a potentially highly effective environmental infection control  
15 technology. Such technologies provide an important supplemental level of safety during  
16 infectious disease outbreaks and overall improvement in infection prevention  
17 programs.

18

19

20 **ACKNOWLEDGEMENTS**

21 The authors acknowledge Elizabeth Hutt Pollard, Sean Morham, Sue Barnes, Bill Morris  
22 and Leo Selker for their considerable contributions.

23

24

25

26



1 **FIGURES**

2

3 **Figure 1.**

| Infection type | Event rate before silver ion laundry treatment (per 10,000 patient days) | Event rate after silver ion laundry treatment (per 10,000 patient days) | <i>p</i> value | Odds ratio (95% confidence interval) |
|----------------|--------------------------------------------------------------------------|-------------------------------------------------------------------------|----------------|--------------------------------------|
| CAUTI          | 8.8                                                                      | 5.2                                                                     | 0.08119*       | 0.623 (0.352-1.067)                  |
| CDI            | 4.7                                                                      | 2.4                                                                     | 0.00139*       | 0.588 (0.418-0.823)                  |
| SSI            | 70.2                                                                     | 66.2                                                                    | 0.69318        | 0.943 (0.72-1.23)                    |
| CLABSI         | 4.8                                                                      | 5.0                                                                     | 1              | 1.036 (0.458-2.298)                  |

4

5 **Figure legend:** HAI rates (calculated per 10,000 patient days) at each of the three test hospitals  
6 demonstrated declines in the after-silver ion laundry treatment period. 30 months before  
7 silver ion laundry treatment period is 2013 Q3- 2015 Q4; 30 months after silver ion laundry  
8 treatment is 2016 Q1-2018 Q2. \* Indicates statistical significance

9

10

11

12

13

14

15

16

17

18

19

20

21

22

23

1 **Figure 2.**

2

3

4 - % Change  
5 after/before

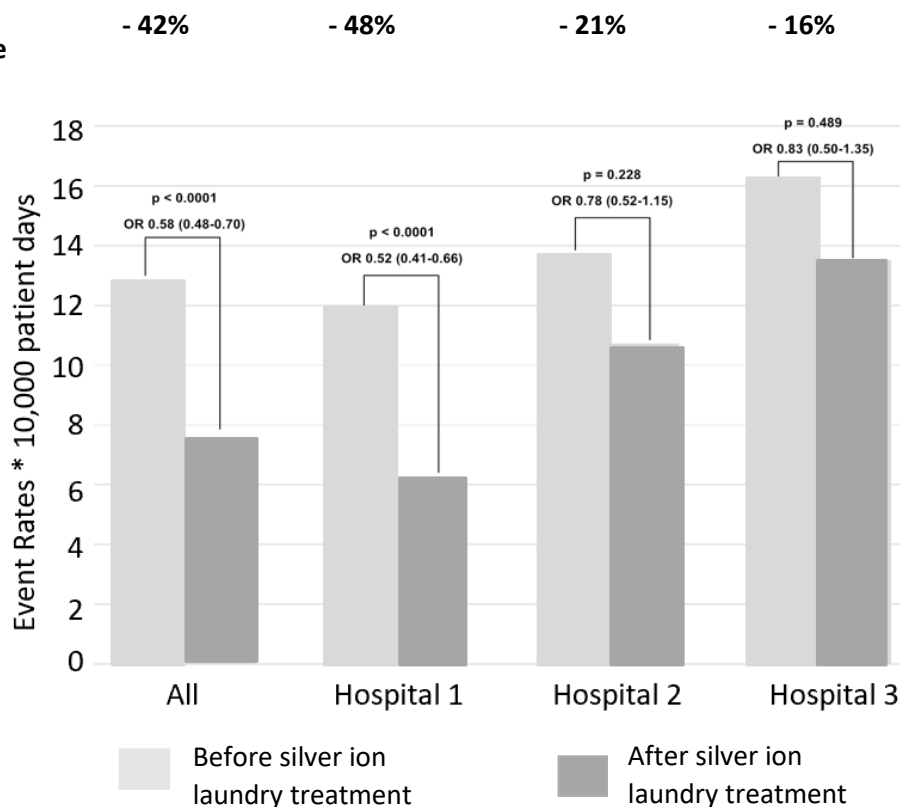

6

7

8

9

10 **Figure legend:**

11 HAI rates (calculated per 10,000 patient days) at each of the three test hospitals demonstrated  
 12 declines in the after-silver ion laundry treatment period. 30 months before-silver ion laundry  
 13 treatment period is 2013 Q3- 2015Q4; 30 months after silver ion laundry treatment is 2016Q1-  
 14 2018Q2.

15

16

17

18

19

1   **REFERENCES:**

- 2   1   Shek, K, Patidar, R, Kohja, Z, Liu,S, Gawaziuk, J, Gawthrop, M, Kumar, A, Logsetty, S. Rate of  
3       contamination of hospital privacy curtains in a burns/plastics ward: A longitudinal study.  
4       *Am.J. Infect. Control.* (2018), 1019-21.
- 5   2   Sundermann, A, et al. How Clean Is the linen at my hospital? The Mucorales on Unclean  
6       Linen Discovery Study of Large United States Transplant and Cancer Centers. *Clin. Infect.*  
7       *Dis.* (2018), DOI: 10.1093/cid/ciy669.
- 8   3   Butler, J.P. Effect of copper-impregnated composite bed linens and patient gowns on  
9       healthcare-associated infection rates in six hospitals. *J. Hosp. Infect.* 100 (2018) e130-e134.
- 10  4   Openshaw, J, Morris, W, Lowry, G and Nazmi, A. Reduction in bacterial contamination of  
11       hospital textiles by a novel silver-based laundry treatment. *Am. J. Infect. Control.* 44 (2016)  
12       1705-8.
- 13  5   Wei, L, Lin, J, Duan, X, Huang, W, Lu, X, Zhou, J and Zong, Z. Asymptomatic COVID-19  
14       patients can contaminate their surroundings: an environmental sample study. *Appl. And*  
15       *Environ. Sciences.* May/June Issue 2020, 5(3): 1-4).
- 16  6   Welle MK, Bliha M, DeLuca J, Frauhiger A, Lamichhane-Khadka R. Bacteria on the Soles of  
17       Patient-Issued Nonskid Slipper Socks: An Overlooked Pathogen Spread Threat? *Orthop Nurs.*  
18       2019;38(1):33–40.
- 19  7   Dellimore, KH, Helyer, AR and Franklin, SE. A scoping review of important urinary catheter  
20       induced complications. *J. Mater. Sci. Mater. Med.* 2013; 24(8):1825-35.
- 21  8   Tarrant J, Jenkins RO, Laird KT. From ward to washer: The survival of *Clostridium difficile*  
22       spores on hospital bed sheets through a commercial UK NHS healthcare laundry  
23       process. *Infect Control Hosp Epidemiol.* 2018;39(12):1406–1411
- 24  9   Chen, Y, Hsueh, Y, Hsieh, C, Tzou, D and Chang, P. Antiviral Activity of Graphene–Silver  
25       Nanocomposites against Non-Enveloped and Enveloped Viruses. *Int. J. Environ. Res. Public*  
26       *Health*2016,13, 430
- 27  10  Huang SS, Datta R, Platt R. 2006. Risk of acquiring antibiotic-resistant bacteria from prior  
28       room occupants. *Arch. Intern. Med.* 166:1945–1951.
